# Supplementary material for: Microinvasion by Streptococcus pneumoniae induces epithelial innate immunity during colonisation at the human mucosal surface
Source: PubMed Central journal article supplement (PMC6635362; doi:10.1038/s41467-019-11005-2), 2019-07-16
Supplement: 41467_2019_11005_MOESM3_ESM.pdf [file 41467_2019_11005_MOESM3_ESM.pdf]

## Description of Additional Supplementary Files

File name: Supplementary Data 1

Description: Differentially upregulated genes from Detroit 562 cells infected with pneumococci; comparisons against non-infected cells.

File name: Supplementary Data 2

Description: Reactome Pathways and Interactome Genes from Detroit 562 cells infected with pneumococci.

File name: Supplementary Data 3

Description: Transcription factor binding site enrichment analysis.

File name: Supplementary Data 4

Description: Differential gene expression from the EHPC model.
